# Supplementary material for: The nonlinearity of regulation in biological networks
Source: PubMed Central journal article supplement (PMC10073134; doi:10.1038/s41540-023-00273-w), 2023-04-04
Supplement: 41540_2023_273_MOESM1_ESM.pdf [file 41540_2023_273_MOESM1_ESM.pdf]

# Supplementary Information

The nonlinearity of regulation in biological networks

Santosh Manicka, Kathleen Johnson, Michael Levin and David Murrugarra

Supplementary Table 1: Dataset Description

| Pubmed ID | Description                                                                                                                                                                                | Category 1  | Category 2 | Linear Approximability |
|-----------|--------------------------------------------------------------------------------------------------------------------------------------------------------------------------------------------|-------------|------------|------------------------|
| 18852469  | A model describing the survival of cytotoxic T lymphocytes in Tcell large granular lymphocyte (T-LGL) leukemia                                                                             | Disease     | Metazoan   | 80.28235               |
| 22102804  | A model of Tcell large granular lymphocyte (T-LGL) leukemia                                                                                                                                | Disease     | Cancer     | 79.27166               |
| 26102287  | A model describing the infection response of Clostridium difficile to antibiotic treatment                                                                                                 | Disease     | Primitive  | 75.69523               |
| 23169817  | A model of the simplified p53 network with low DNA damage                                                                                                                                  | Disease     | Cancer     | 72.36818               |
| 24564942  | A threshold model of the C. elegans early embryonic cell-cycle                                                                                                                             | Regulatory  | Metazoan   | 62.13963               |
| 23169817  | A model of the simplified p53 network with high DNA damage                                                                                                                                 | Disease     | Cancer     | 59.89628               |
| 28209158  | A model of tumorigenic transformation of human epithelial cells                                                                                                                            | Disease     | Cancer     | 57.49518               |
| 30104572  | A model of cell state transition of epithelial-to-mesenchymal transition (EMT)                                                                                                             | Disease     | Cancer     | 56.90066               |
| 25189528  | A model of epithelial-to-mesenchymal transition (EMT) integrating the signaling pathways involved in developmental EMT and known dysregulations in invasive hepatocellular carcinoma (HCC) | Disease     | Metazoan   | 56.86491               |
| 29632237  | A model used to identify key proteins regulating bortezomib                                                                                                                                | Disease     | Cancer     | 55.24462               |
| 31516637  | A model of cellular metabolic flexibility where The inhibitor, Pyruvate, only blocks PDK activity when at least one of its activators is absent from the system.                           | Metabolic   | Metazoan   | 54.61028               |
| 19185585  | A model of budding yeast cell-cycle                                                                                                                                                        | Regulatory  | Primitive  | 54.46379               |
| 27148350  | A model linking the nerve growth factor NGF to the proliferation or differentiation outcomes of the cell                                                                                   | Biochemical | Metazoan   | 52.98308               |
| 23081726  | A model of the Influenza A virus replication cycle                                                                                                                                         | Disease     | Primitive  | 52.82458               |
| 26573569  | A regulatory network model of the differentiation of the human gonadal cells into testes or ovaries                                                                                        | Regulatory  | Metazoan   | 52.75945               |

|          |                                                                                                                                                              |             |           |          |
|----------|--------------------------------------------------------------------------------------------------------------------------------------------------------------|-------------|-----------|----------|
| 31516637 | A model of cellular metabolic flexibility where the inhibitor, Pyruvate, always blocks PDK activity when it is present in the system.                        | Metabolic   | Metazoan  | 52.21167 |
| 30038409 | A model of genes/proteins responsible for loss/gain of function in human pluripotent stem cells                                                              | Regulatory  | Metazoan  | 51.17677 |
| 24970389 | A protein interaction model to elucidate drug resistance in breast cancer                                                                                    | Disease     | Cancer    | 50.66349 |
| 22102804 | A reduced model of T cell large granular lymphocyte (T-LGL) leukemia                                                                                         | Disease     | Metazoan  | 50.23742 |
| 31130988 | FA-CHKREC (G2 checkpoint and the checkpoint recovery) model, which explores how FA cells might use DDA (DNA damage adaptation)                               | Disease     | Metazoan  | 45.55726 |
| 32054948 | A model of the G1/S checkpoint regulation contemplating the regulatory influences of both miR-34a and miR-16                                                 | Disease     | Metazoan  | 45.41591 |
| 16542429 | A model of the regulatory network governing the differentiation of CD4+ T cells                                                                              | Biochemical | Metazoan  | 44.35813 |
| 26244885 | A model of the Septation Initiation Network that controls cytokinesis in fission yeast                                                                       | Regulatory  | Metazoan  | 44.00536 |
| 22253585 | A model of host immune response to single and coinfection                                                                                                    | Disease     | Primitive | 43.39992 |
| 30024932 | A model of the G2/M checkpoint arrest regulation contemplating the influence of miR-449a                                                                     | Disease     | Metazoan  | 41.20924 |
| 29378814 | a model to predict stabilized Pluripotent stem cells (PSC) gene regulatory network (GRN) states in response to input signals                                 | Regulatory  | Metazoan  | 39.44636 |
| 28584084 | A model encompassing the main transcription factors and signaling components involved in myeloid and lymphoid development.                                   | Biochemical | Metazoan  | 38.83446 |
| 24970389 | A protein interaction model to elucidate drug resistance in breast cancer                                                                                    | Disease     | Cancer    | 38.59772 |
| 19524598 | The simplified model of regulation of apoptosis via the NFkB pathway                                                                                         | Biochemical | Metazoan  | 37.31991 |
| 22448278 | A model of Mycobacterium tuberculosis                                                                                                                        | Disease     | Primitive | 35.75686 |
| 24970389 | A cell signaling network model to elucidate drug resistance in breast cancer                                                                                 | Disease     | Cancer    | 34.81927 |
| 30953496 | A model integrating the insulin resistance pathway with pancreatic $\beta$ -cell apoptosis pathway which are responsible for Type 2 diabetes mellitus (T2DM) | Disease     | Metazoan  | 34.81698 |
| 24970389 | A protein interaction model to elucidate drug resistance in breast cancer                                                                                    | Disease     | Cancer    | 34.08386 |

|          |                                                                                                                                                              |             |           |          |
|----------|--------------------------------------------------------------------------------------------------------------------------------------------------------------|-------------|-----------|----------|
| 31949240 | A model of renovascular disease (RVD)                                                                                                                        | Disease     | Metazoan  | 33.98901 |
| 28426669 | A model of the gene regulatory network <i>Arabidopsis thaliana</i>                                                                                           | Regulatory  | Plants    | 33.95125 |
| 28639170 | A model of the wellknown arabinose operon in <i>E. coli</i>                                                                                                  | Metabolic   | Primitive | 33.72184 |
| 21853041 | A model of myeloid differentiation                                                                                                                           | Regulatory  | Metazoan  | 32.63689 |
| 30953496 | A model integrating the insulin resistance pathway with pancreatic $\beta$ -cell apoptosis pathway which are responsible for Type 2 diabetes mellitus (T2DM) | Disease     | Metazoan  | 32.06319 |
| 28381275 | A model of colorectal tumorigenesis                                                                                                                          | Disease     | Cancer    | 32.06171 |
| 26616283 | A model of oncogenic pathways in NB                                                                                                                          | Disease     | Cancer    | 31.66786 |
| 26340681 | A model of cell-cycle regulation in plants                                                                                                                   | Regulatory  | Plants    | 31.66438 |
| 23868318 | A model of FGF signaling pathway in <i>drosophila</i>                                                                                                        | Regulatory  | Metazoan  | 31.52491 |
| 25908096 | A model of iron acquisition and oxidative stress response in the fungal pathogen <i>aspergillus fumigatus</i>                                                | Metabolic   | Primitive | 31.51053 |
| 22267503 | A model of Fanconi Anemia/Breast Cancer pathway elucidating the repair of DNA strands                                                                        | Disease     | Metazoan  | 31.23094 |
| 26244885 | A model of the Septation Initiation Network                                                                                                                  | Regulatory  | Metazoan  | 31.0255  |
| 27542373 | A model of the allowed long-term behaviors of the stomatal opening process in plants                                                                         | Signaling   | Plants    | 30.77432 |
| 28426669 | A model of the gene regulatory network <i>Arabidopsis thaliana</i>                                                                                           | Regulatory  | Plants    | 30.44945 |
| 24970389 | A protein interaction model to elucidate drug resistance in breast cancer                                                                                    | Disease     | Cancer    | 30.28947 |
| 31516637 | A model of cellular metabolic flexibility where Fatty Acid mediated activation of PDK bypasses Pyruvate mediated inhibition.                                 | Metabolic   | Metazoan  | 29.3459  |
| 29237040 | A logical model of initiation of the metastatic process in cancer                                                                                            | Disease     | Cancer    | 28.56148 |
| 16464248 | A model of the Tcell receptor signaling                                                                                                                      | Signaling   | Metazoan  | 27.97508 |
| 24970389 | A protein interaction model to elucidate drug resistance in breast cancer                                                                                    | Disease     | Cancer    | 27.57258 |
| 22253585 | A model of host immune response to single and coinfection                                                                                                    | Disease     | Primitive | 27.4484  |
| 22192526 | A model of the <i>Arabidopsis thaliana</i> root stemcell niche                                                                                               | Signaling   | Plants    | 27.19403 |
| 29230182 | A model of the molecular regulatory network involved in the control of angiogenesis                                                                          | Biochemical | Metazoan  | 26.51007 |
| 30116195 | A model of the regulation in the differentiation process of major Tcell subtypes, i.e., Th1, Th2, Th17 and iTreg cells.                                      | Biochemical | Metazoan  | 26.25546 |

|          |                                                                                                                              |             |           |          |
|----------|------------------------------------------------------------------------------------------------------------------------------|-------------|-----------|----------|
| 23743337 | A gene regulatory network model of T lymphocyte differentiation                                                              | Regulatory  | Metazoan  | 26.18992 |
| 24079299 | A regulatory model of Salmonella typhimurium                                                                                 | Disease     | Primitive | 25.50749 |
| 28187161 | A Boolean network CARENET (Cambium REgulation gene NETwork) for modeling cambium activity                                    | Regulatory  | Plants    | 24.49806 |
| 26207376 | A model of gene regulation in the cardiac progenitor cells involved in early vertebrate development                          | Regulatory  | Metazoan  | 23.17666 |
| 27464342 | A model of the M1 (LPS-activated) and M2 (IL-4/13-activated) macrophage polarization types                                   | Signaling   | Metazoan  | 22.47601 |
| 11082279 | A model of the ras, Raf, MAPK/ERK signaling pathway                                                                          | Biochemical | Metazoan  | 22.18949 |
| 24250280 | A comprehensive and generic reaction map for the MAPK signaling network                                                      | Disease     | Metazoan  | 21.58656 |
| 29622038 | A phenotype control kernel (PCK) model of the mitogen-activated protein kinase(MAPK) model                                   | Disease     | Metazoan  | 21.54371 |
| 26385365 | A model of how mutations in the FA/BRCA pathway cause Fanconi anemia                                                         | Disease     | Metazoan  | 21.48794 |
| 22253585 | A model of within-host immunodynamics                                                                                        | Disease     | Primitive | 20.64292 |
| 26408858 | A model of the regulatory network of lymphopoiesis                                                                           | Regulatory  | Metazoan  | 20.25874 |
| 24376455 | A model of a metastatic melanoma network                                                                                     | Disease     | Cancer    | 20.25273 |
| 24069138 | A threshold model of the cell-cycle control network of yeast <i>S. pombe</i>                                                 | Regulatory  | Primitive | 20.16704 |
| 26751566 | A dynamic model for the regulatory network that controls terminal B cell differentiation                                     | Biochemical | Metazoan  | 19.476   |
| 25538703 | A model elucidating the role of the CAV1 scaffold protein in Tcell leukemia                                                  | Disease     | Metazoan  | 19.43595 |
| 31516637 | A model of cellular metabolic flexibility where Acetyl-CoA mediated activation of PDK bypasses Pyruvate mediated inhibition. | Metabolic   | Metazoan  | 19.41784 |
| 29186334 | A model to describe temporal expression patterns observed in GMP-derived cells                                               | Regulatory  | Metazoan  | 18.79806 |
| 1753781  | A model of tumor immunity                                                                                                    | Disease     | Cancer    | 18.37732 |
| 23868318 | A model of receptor signaling pathways, including EGFR, G-protein-coupled receptor, integrin, and stress pathways            | Regulatory  | Metazoan  | 16.81161 |

|          |                                                                                                                                                                   |             |           |          |
|----------|-------------------------------------------------------------------------------------------------------------------------------------------------------------------|-------------|-----------|----------|
| 17722974 | A model of Tcell activation via the Tcell receptor, the CD4/CD8 co-receptors, and the accessory signaling receptor CD28                                           | Signaling   | Metazoan  | 16.73999 |
| 30281473 | A model of the aberrant signaling in pancreatic cancer                                                                                                            | Disease     | Cancer    | 16.02394 |
| 20169167 | A model of the Pseudomonas syringae                                                                                                                               | Disease     | Primitive | 15.87294 |
| 23056457 | A model of gene regulation underlying early cardiac development in mammals                                                                                        | Regulatory  | Metazoan  | 15.83555 |
| 28361666 | A model of castration-resistant prostate cancer                                                                                                                   | Disease     | Cancer    | 15.29735 |
| 27138333 | A model of the signaling network associated with RCP-driven invasive migration                                                                                    | Disease     | Cancer    | 15.04079 |
| 16968132 | A model of water conservation via stomatal opening in plants                                                                                                      | Signaling   | Plants    | 13.58676 |
| 20221256 | A model of the interplay between the NFkB pro-survival pathway, RIP1-dependent necrosis, and the apoptosis pathway in response to death receptor-mediated signals | Biochemical | Metazoan  | 13.55924 |
| 23233838 | A signaling pathway model of apoptosis in yeast                                                                                                                   | Regulatory  | Primitive | 12.98085 |
| 29596489 | A mathematical in silico model that robustly recapitulates the crosstalk between IGF and Wnt signaling.                                                           | Signaling   | Metazoan  | 12.92163 |
| 22962472 | A model of keratinocyte cell migration mediated by hepatocyte growth factors                                                                                      | Signaling   | Metazoan  | 12.1657  |
| 27613445 | A model of the signaling pathways that control S-phase entry and a specific-type of senescence called geroconversion                                              | Regulatory  | Metazoan  | 10.90313 |
| 18463633 | A model of cyclic gene expression during cell division in budding yeast                                                                                           | Regulatory  | Primitive | 10.87729 |
| 25063553 | A model of the hormonal control of hepatic metabolism using insulin and glucagon signaling                                                                        | Metabolic   | Metazoan  | 10.86576 |
| 25063553 | A model of the hormonal control of hepatic metabolism using insulin and glucagon signaling                                                                        | Metabolic   | Metazoan  | 9.87147  |
| 23868318 | A model of receptor signaling pathways, including EGFR, G-protein-coupled receptor, integrin, and stress pathways                                                 | Regulatory  | Metazoan  | 9.859414 |
| 20221256 | A model of apoptosis involving death-receptor mediated signals                                                                                                    | Regulatory  | Metazoan  | 9.835997 |
| 25163068 | A model of the complete quorum sensing system of Pseudomonas aeruginosa                                                                                           | Signaling   | Primitive | 9.655856 |
| 19422837 | A model of apoptosis involving external growth factors                                                                                                            | Signaling   | Metazoan  | 9.007914 |
| 16873462 | A model of the mammalian cell-cycle                                                                                                                               | Regulatory  | Metazoan  | 8.110625 |
| 30518777 | A model of the ABA signaling pathway                                                                                                                              | Signaling   | Plants    | 7.068097 |

|          |                                                                                                                                                                  |             |           |          |
|----------|------------------------------------------------------------------------------------------------------------------------------------------------------------------|-------------|-----------|----------|
| 25780058 | A model of a Rho-family GTPases signaling network                                                                                                                | Disease     | Metazoan  | 6.516515 |
| 25063553 | A model of the hormonal control of hepatic metabolism using insulin and glucagon signaling                                                                       | Metabolic   | Metazoan  | 6.489934 |
| 25063553 | A model of the hormonal control of hepatic metabolism using insulin and glucagon signaling                                                                       | Metabolic   | Metazoan  | 6.431252 |
| 26163548 | A signaling pathway model describing the interaction between a drug and cellular outcomes in multiple myeloma cells                                              | Signaling   | Metazoan  | 5.942066 |
| 29206223 | A model to predict different in-silico knockouts that prevent key SASP-mediators, IL-6 and IL-8, from getting activated upon DNA damage                          | Biochemical | Metazoan  | 5.414375 |
| 26446703 | A model of colitis-associated colon cancer involving P53, MDM2, and AKT                                                                                          | Disease     | Metazoan  | 4.918872 |
| 19144179 | A model of glucose regulation in yeast                                                                                                                           | Metabolic   | Primitive | 4.804903 |
| 30530226 | A model of the crosstalk between the TGF- $\beta$ , p38 MAPK and cell-cycle checkpoint pathways which qualitatively describes this dual behavior of TGF- $\beta$ | Signaling   | Metazoan  | 4.597779 |
| 21563979 | A model of glucose regulation via the Lac operon                                                                                                                 | Metabolic   | Primitive | 3.447058 |
| 23049686 | A model of cell-cycle in budding yeast                                                                                                                           | Regulatory  | Primitive | 3.288717 |
| 23868318 | A model of receptor signaling pathways, including EGFR, G-protein-coupled receptor, integrin, and stress pathways                                                | Regulatory  | Metazoan  | 2.027278 |
| 17010384 | A model used to simulate a molecular pathway between two neurotransmitter receptors: dopamine and glutamate receptors                                            | Signaling   | Metazoan  | 0.686516 |
| 23171249 | A regulatory model of the TOL multi-protein complex system found on the cell membrane of gram negative bacteria                                                  | Metabolic   | Metazoan  | 0.508221 |
| 23868318 | A model of interaction between nine key signaling pathways in drosophila                                                                                         | Regulatory  | Metazoan  | 0.074953 |
| 16464248 | A model of a typical signaling pathway where mass and signal flow occur simultaneously                                                                           | Signaling   | Metazoan  | 0        |
| 18194572 | A logical model of HGF and H. pylori induced c-Met signal transduction                                                                                           | Disease     | Metazoan  | 0        |
| 27594840 | A model linking the hematopoietic stem progenitor cells and mesenchymal stromal cells in the bone marrow                                                         | Disease     | Metazoan  | -0.19119 |
| 23520449 | A model of body segmentation in drosophila melanogaster                                                                                                          | Biochemical | Metazoan  | -0.30788 |

|          |                                                                                                                                                       |             |           |          |
|----------|-------------------------------------------------------------------------------------------------------------------------------------------------------|-------------|-----------|----------|
| 23764028 | A model of the effect of TGF- $\beta$ 1 on misquitos with the parasite Plasmodium falciparum                                                          | Disease     | Metazoan  | -0.71147 |
| 21639591 | A model for phospholipase C-coupled calcium signaling pathways                                                                                        | Signaling   | Metazoan  | -0.76057 |
| 18433497 | A model of cellular immune response integrating toll-like receptor, interferon, NF-kappaB and apoptotic pathways                                      | Signaling   | Metazoan  | -1.00938 |
| 19025648 | A model of physiological regulation in cholestrol biosynthesis                                                                                        | Metabolic   | Metazoan  | -1.24445 |
| 30546316 | A model for the generegulation driving macrophage polarization to the M1, M2a, M2b, and M2c phenotypes                                                | Signaling   | Metazoan  | -2.01878 |
| 23469179 | A model of cancer network regulated by miR-17-92 cluster                                                                                              | Disease     | Cancer    | -2.71715 |
| 19118495 | A regulatory model of the cell-cycle involving the transmembrane tyrosine kinase ERBB2                                                                | Disease     | Metazoan  | -3.46556 |
| 23134720 | A model linking the oxidative stress pathway to apoptosis                                                                                             | Biochemical | Metazoan  | -3.86379 |
| 26346668 | A model is used to map environmental and flow induced signals to endothelial cell phenotype (proliferation,migration, apoptosis, and lumen formation) | Disease     | Cancer    | -4.09752 |
| 32870080 | A model of the lac operon with feedback                                                                                                               | Regulatory  | Primitive | -4.53977 |
| 26090929 | An integrated regulatory and signaling pathway model of the fate of the CD4+ T immune cells                                                           | Biochemical | Metazoan  | -6.53616 |
| 20659480 | ABA-induced closure model (ABA signal transduction network)                                                                                           | Signaling   | Plants    | -9.87253 |
| 25980672 | A model of the melanogenesis signaling network                                                                                                        | Signaling   | Metazoan  | -9.90163 |
| 21968890 | A model of signaling pathway involving the pro-inflammatory cytokines interleukin 1 (IL-1)                                                            | Signaling   | Metazoan  | -13.6196 |
| 31048917 | A model of Drosophila melanogaster                                                                                                                    | Regulatory  | Metazoan  | -13.6436 |
| 23868318 | A model of interaction between nine key signaling pathways in drosophila                                                                              | Regulatory  | Metazoan  | -13.9899 |
| 21968890 | A model of signaling pathway involving the pro-inflammatory cytokines interleukin 6 (IL-6)                                                            | Signaling   | Metazoan  | -14.0946 |
| 19622164 | A model of the external signaling molecule TNFa                                                                                                       | Disease     | Metazoan  | -17.2082 |
| 19622164 | A model of the external signaling molecule TNFb1                                                                                                      | Disease     | Metazoan  | -17.4249 |
| 28455685 | A model of the epidermal growth factor receptor signaling of a breast epithelial cell line, MFC10A.                                                   | Disease     | Cancer    | -18.4117 |

|          |                                                                                                                                           |            |          |          |
|----------|-------------------------------------------------------------------------------------------------------------------------------------------|------------|----------|----------|
| 30323768 | A model gene regulatory network (GRN) of latent proviruses in resting CD4+ Tcell to visualize the complexity of the HIV-1 gene expression | Disease    | Metazoan | -20.8165 |
| 26528548 | A regulatory network model of early metasis development                                                                                   | Disease    | Cancer   | -78.6659 |
| 20862356 | A gene regulatory model of spatial expression patterns in the cerebral cortex                                                             | Regulatory | Metazoan | -92.6647 |
